# Supplementary material for: Ten-year panel data confirm generation gap but climate beliefs increase at similar rates across ages
Source: PubMed Central journal article supplement (PMC8260718; doi:10.1038/s41467-021-24245-y), 2021-07-06
Supplement: 41467_2021_24245_MOESM1_ESM.pdf [file 41467_2021_24245_MOESM1_ESM.pdf]

## **Supplementary Information**

### **Article:**

Ten-year panel data confirm generation gap but climate beliefs increase at similar rates across ages

### **Authors:**

Taciano L. Milfont<sup>1\*</sup>, Elena Zubielevitch<sup>2</sup>, Petar Milojev<sup>2</sup>, and Chris G. Sibley<sup>2</sup>

### **Affiliations:**

<sup>1</sup>School of Psychology, University of Waikato, New Zealand; <sup>2</sup>School of Psychology, University of Auckland, New Zealand

### **Corresponding author:**

Taciano L. Milfont, School of Psychology, University of Waikato, Private Bag 3105, Hamilton 3240, New Zealand. Email: [taciano.milfont@waikato.ac.nz](mailto:taciano.milfont@waikato.ac.nz)

Supplementary Table 1 presents the distribution of responses for the climate change beliefs across ages. This table updates the table provided by Milfont, Wilson and Sibley (2017).

Milfont, T. L., Wilson, M. S., & Sibley, C. G. The public’s belief in climate change and its human cause are increasing over time. *PLoS ONE* **12**, e0174246 (2017).

Supplementary Table 1. Distribution of responses to the statements “Climate change is real” (reality) and “Climate change is caused by humans” (cause) in the first ten waves of the New Zealand Attitudes and Values Study, with descriptive statistics for each statement at each wave. Distributions are based on valid percent and sample sizes at each time point refer to those who completed at least one time point of the first ten waves of the New Zealand Attitudes and Values Study.

|      |           | Response Option   |    |    |     |     |     |                |          |           |          |
|------|-----------|-------------------|----|----|-----|-----|-----|----------------|----------|-----------|----------|
|      |           | 1                 | 2  | 3  | 4   | 5   | 6   | 7              |          |           |          |
| Year | Statement | Strongly Disagree |    |    |     |     |     | Strongly Agree | <i>M</i> | <i>SD</i> | <i>N</i> |
| 2009 | Reality   | 4%                | 4% | 6% | 14% | 15% | 24% | 34%            | 5.39     | 1.66      | 6062     |
|      | Cause     | 6%                | 7% | 8% | 19% | 19% | 22% | 19%            | 4.82     | 1.73      | 6008     |
| 2010 | Reality   | 4%                | 5% | 5% | 15% | 17% | 26% | 28%            | 5.29     | 1.64      | 4125     |
|      | Cause     | 6%                | 7% | 8% | 19% | 20% | 21% | 18%            | 4.74     | 1.74      | 4104     |
| 2011 | Reality   | 3%                | 4% | 5% | 14% | 18% | 25% | 31%            | 5.41     | 1.58      | 6499     |
|      | Cause     | 6%                | 7% | 8% | 19% | 20% | 23% | 18%            | 4.79     | 1.72      | 6455     |
| 2012 | Reality   | 3%                | 3% | 5% | 13% | 16% | 26% | 34%            | 5.48     | 1.59      | 10079    |
|      | Cause     | 5%                | 6% | 9% | 18% | 21% | 22% | 20%            | 4.88     | 1.70      | 10018    |
| 2013 | Reality   | 3%                | 3% | 4% | 12% | 14% | 25% | 39%            | 5.60     | 1.58      | 17278    |
|      | Cause     | 5%                | 5% | 7% | 16% | 19% | 23% | 25%            | 5.08     | 1.70      | 17245    |
| 2014 | Reality   | 2%                | 2% | 3% | 11% | 17% | 25% | 40%            | 5.73     | 1.44      | 14973    |
|      | Cause     | 3%                | 4% | 6% | 16% | 21% | 23% | 27%            | 5.24     | 1.60      | 14925    |
| 2015 | Reality   | 2%                | 2% | 3% | 9%  | 15% | 26% | 43%            | 5.84     | 1.41      | 13283    |
|      | Cause     | 3%                | 4% | 5% | 13% | 19% | 26% | 30%            | 5.36     | 1.60      | 13260    |
| 2016 | Reality   | 2%                | 2% | 3% | 8%  | 12% | 24% | 51%            | 6.02     | 1.34      | 20686    |
|      | Cause     | 3%                | 3% | 5% | 12% | 17% | 26% | 35%            | 5.56     | 1.53      | 20644    |
| 2017 | Reality   | 1%                | 2% | 2% | 7%  | 11% | 23% | 54%            | 6.09     | 1.32      | 16063    |
|      | Cause     | 3%                | 3% | 4% | 11% | 16% | 26% | 37%            | 5.60     | 1.53      | 16012    |
| 2018 | Reality   | 2%                | 2% | 2% | 6%  | 9%  | 19% | 59%            | 6.14     | 1.37      | 43473    |
|      | Cause     | 3%                | 3% | 4% | 10% | 15% | 23% | 41%            | 5.64     | 1.59      | 43316    |

Supplementary Table 2. Parameter coefficients for the cohort-based unconstrained models for “Climate change is real” (reality) and “Climate change is caused by humans” (cause)

|              |          | Climate Reality |      |          |                 |         |       | Climate Cause |      |          |                 |         |       |
|--------------|----------|-----------------|------|----------|-----------------|---------|-------|---------------|------|----------|-----------------|---------|-------|
| Birth cohort |          | Est.            | SE   | Est./S.E | <i>p</i> -value | 95% CIs |       | Est.          | SE   | Est./S.E | <i>p</i> -value | 95% CIs |       |
|              |          |                 |      |          |                 | LB      | UB    |               |      |          |                 | LB      | UB    |
| 1995-1991    | <i>i</i> | 6.00            | 1.71 | 3.52     | < .001          | 2.66    | 9.35  | 1.72          | 1.82 | 0.94     | .346            | -1.85   | 5.28  |
|              | <i>s</i> | -1.45           | 1.37 | -1.05    | .292            | -4.14   | 1.24  | -4.82         | 1.46 | -3.29    | .001            | -7.69   | -1.95 |
|              | <i>q</i> | -0.56           | 0.27 | -2.05    | .040            | -1.10   | -0.03 | -1.29         | 0.29 | -4.44    | < .001          | -1.87   | -0.72 |
| 1990-1986    | <i>i</i> | 9.80            | 0.69 | 14.30    | < .001          | 8.46    | 11.15 | 6.94          | 0.73 | 9.51     | < .001          | 5.51    | 8.37  |
|              | <i>s</i> | 2.61            | 0.67 | 3.88     | < .001          | 1.29    | 3.93  | -0.00         | 0.72 | -0.01    | .996            | -1.41   | 1.40  |
|              | <i>q</i> | 0.36            | 0.16 | 2.21     | .027            | 0.04    | 0.68  | -0.34         | 0.17 | -1.97    | .049            | -0.68   | -0.00 |
| 1985-1981    | <i>i</i> | 7.89            | 0.39 | 20.48    | < .001          | 7.13    | 8.64  | 7.12          | 0.41 | 17.42    | < .001          | 6.32    | 7.92  |
|              | <i>s</i> | 1.43            | 0.51 | 2.82     | .005            | 0.44    | 2.43  | 0.86          | 0.54 | 1.60     | .111            | -0.20   | 1.91  |
|              | <i>q</i> | 0.13            | 0.16 | 0.78     | .434            | -0.19   | 0.44  | -0.08         | 0.17 | -0.47    | .637            | -0.42   | 0.26  |
| 1980-1976    | <i>i</i> | 7.35            | 0.15 | 48.81    | < .001          | 7.06    | 7.65  | 6.88          | 0.16 | 43.17    | < .001          | 6.56    | 7.19  |
|              | <i>s</i> | 1.82            | 0.30 | 6.09     | < .001          | 1.24    | 2.41  | 1.59          | 0.32 | 5.02     | < .001          | 0.97    | 2.21  |
|              | <i>q</i> | 0.49            | 0.14 | 3.53     | < .001          | 0.22    | 0.76  | 0.30          | 0.15 | 2.04     | .042            | 0.01    | 0.59  |
| 1975-1971    | <i>i</i> | 6.50            | 0.04 | 184.61   | < .001          | 6.43    | 6.57  | 6.04          | 0.04 | 160.85   | < .001          | 5.97    | 6.12  |
|              | <i>s</i> | 1.43            | 0.14 | 10.01    | < .001          | 1.15    | 1.71  | 1.14          | 0.15 | 7.58     | < .001          | 0.84    | 1.43  |
|              | <i>q</i> | 0.51            | 0.12 | 4.20     | < .001          | 0.27    | 0.75  | 0.14          | 0.13 | 1.11     | .266            | -0.11   | 0.39  |
| 1970-1966    | <i>i</i> | 5.82            | 0.02 | 319.28   | < .001          | 5.79    | 5.86  | 5.36          | 0.02 | 264.13   | < .001          | 5.32    | 5.40  |
|              | <i>s</i> | 0.89            | 0.04 | 25.06    | < .001          | 0.82    | 0.96  | 0.95          | 0.04 | 25.18    | < .001          | 0.88    | 1.03  |
|              | <i>q</i> | 0.34            | 0.11 | 3.07     | .002            | 0.12    | 0.55  | -0.08         | 0.12 | -0.73    | .467            | -0.31   | 0.14  |
| 1965-1961    | <i>i</i> | 5.32            | 0.03 | 214.48   | < .001          | 5.27    | 5.37  | 4.77          | 0.03 | 177.43   | < .001          | 4.72    | 4.82  |
|              | <i>s</i> | 0.79            | 0.10 | 8.38     | < .001          | 0.61    | 0.98  | 1.01          | 0.10 | 10.16    | < .001          | 0.81    | 1.20  |
|              | <i>q</i> | 0.13            | 0.10 | 1.25     | .210            | -0.07   | 0.33  | -0.08         | 0.11 | -0.70    | .484            | -0.29   | 0.14  |
| 1960-1956    | <i>i</i> | 5.27            | 0.09 | 60.48    | < .001          | 5.10    | 5.44  | 4.42          | 0.09 | 48.33    | < .001          | 4.24    | 4.60  |
|              | <i>s</i> | -0.00           | 0.19 | -0.01    | .996            | -0.38   | 0.38  | 0.61          | 0.20 | 3.01     | .003            | 0.21    | 1.00  |
|              | <i>q</i> | 0.46            | 0.10 | 4.47     | < .001          | 0.26    | 0.66  | 0.17          | 0.11 | 1.55     | .122            | -0.04   | 0.38  |
| 1955-1951    | <i>i</i> | 4.71            | 0.22 | 20.98    | < .001          | 4.27    | 5.15  | 3.37          | 0.24 | 14.33    | < .001          | 2.91    | 3.83  |
|              | <i>s</i> | 0.42            | 0.33 | 1.30     | .195            | -0.22   | 1.06  | 1.42          | 0.34 | 4.17     | < .001          | 0.75    | 2.09  |
|              | <i>q</i> | 0.16            | 0.11 | 1.41     | .158            | -0.06   | 0.39  | -0.16         | 0.12 | -1.35    | .176            | -0.40   | 0.07  |
| 1950-1946    | <i>i</i> | 5.25            | 0.49 | 10.76    | < .001          | 4.29    | 6.21  | 4.22          | 0.51 | 8.32     | < .001          | 3.23    | 5.22  |
|              | <i>s</i> | -0.75           | 0.53 | -1.42    | .156            | -1.77   | 0.28  | -0.39         | 0.55 | -0.72    | .469            | -1.46   | 0.67  |
|              | <i>q</i> | 0.46            | 0.14 | 3.30     | .001            | 0.19    | 0.73  | 0.38          | 0.14 | 2.65     | .008            | 0.10    | 0.67  |
| 1945-1941    | <i>i</i> | 4.81            | 0.99 | 4.85     | < .001          | 2.86    | 6.75  | 5.36          | 1.03 | 5.20     | < .001          | 3.34    | 7.38  |
|              | <i>s</i> | -0.49           | 0.84 | -0.58    | .562            | -2.14   | 1.16  | -1.52         | 0.88 | -1.74    | .083            | -3.24   | 0.20  |
|              | <i>q</i> | 0.32            | 0.18 | 1.81     | .071            | -0.03   | 0.67  | 0.54          | 0.18 | 2.92     | .004            | 0.18    | 0.90  |
| 1940-1936    | <i>i</i> | 6.77            | 1.90 | 3.57     | < .001          | 3.05    | 10.49 | 9.27          | 1.97 | 4.70     | < .001          | 5.40    | 13.14 |
|              | <i>s</i> | -1.94           | 1.34 | -1.45    | .147            | -4.57   | 0.69  | -4.17         | 1.39 | -2.99    | .003            | -6.90   | -1.43 |
|              | <i>q</i> | 0.52            | 0.24 | 2.21     | .027            | 0.06    | 0.98  | 0.90          | 0.24 | 3.66     | < .001          | 0.42    | 1.37  |

*i* = intercept, *s* = linear slope, *q* = quadratic slope.

Supplementary Table 3. Parameter coefficients for the partially-constrained cohort-based models for “Climate change is real” (reality) and “Climate change is caused by humans” (cause)

| Climate Reality |                             | Means    |      |         |                 | 95% CIs |      | Variances |      |
|-----------------|-----------------------------|----------|------|---------|-----------------|---------|------|-----------|------|
|                 |                             | Estimate | SE   | Est./SE | <i>p</i> -value | LB      | UB   | Est       | SE   |
| 1995-1991       |                             | 8.49     | 0.04 | 193.57  | < .001          | 8.40    | 8.57 | 1.14*     | 0.01 |
| 1990-1986       |                             | 7.94     | 0.03 | 232.61  | < .001          | 7.88    | 8.01 | 1.14*     | 0.01 |
| 1985-1981       |                             | 7.45     | 0.03 | 280.98  | < .001          | 7.40    | 7.50 | 1.14*     | 0.01 |
| 1980-1976       |                             | 6.98     | 0.02 | 337.76  | < .001          | 6.94    | 7.02 | 1.14*     | 0.01 |
| 1975-1971       | Intercepts                  | 6.42     | 0.02 | 386.42  | < .001          | 6.38    | 6.45 | 1.14*     | 0.01 |
| 1970-1966       | freely                      | 5.85     | 0.02 | 384.76  | < .001          | 5.82    | 5.88 | 1.14*     | 0.01 |
| 1965-1961       | estimated                   | 5.30     | 0.02 | 333.10  | < .001          | 5.27    | 5.33 | 1.14*     | 0.01 |
| 1960-1956       |                             | 4.85     | 0.02 | 252.93  | < .001          | 4.81    | 4.88 | 1.14*     | 0.01 |
| 1955-1951       |                             | 4.34     | 0.03 | 165.93  | < .001          | 4.29    | 4.39 | 1.14*     | 0.01 |
| 1950-1946       |                             | 3.79     | 0.04 | 92.39   | < .001          | 3.71    | 3.87 | 1.14*     | 0.01 |
| 1945-1941       |                             | 3.30     | 0.06 | 59.57   | < .001          | 3.19    | 3.41 | 1.14*     | 0.01 |
| 1940-1936       |                             | 2.90     | 0.08 | 37.62   | < .001          | 2.75    | 3.05 | 1.14*     | 0.01 |
| All cohorts     | Linear slope constrained    | 0.93     | 0.01 | 82.07   | < .001          | 0.90    | 0.95 | 0.05*     | 0.01 |
| All cohorts     | Quadratic slope constrained | -0.01    | 0.00 | -1.74   | .082            | -0.02   | 0.00 | 0.00      | 0.00 |

  

| Climate Cause |                             | Means    |      |         |                 | 95% CIs |       | Variances |      |
|---------------|-----------------------------|----------|------|---------|-----------------|---------|-------|-----------|------|
|               |                             | Estimate | SE   | Est./SE | <i>p</i> -value | LB      | UB    | Est       | SE   |
| 1995-1991     |                             | 8.45     | 0.05 | 175.88  | < .001          | 8.36    | 8.54  | 1.56*     | 0.02 |
| 1990-1986     |                             | 7.79     | 0.04 | 208.10  | < .001          | 7.71    | 7.86  | 1.56*     | 0.02 |
| 1985-1981     |                             | 7.27     | 0.03 | 247.58  | < .001          | 7.21    | 7.32  | 1.56*     | 0.02 |
| 1980-1976     |                             | 6.67     | 0.02 | 288.64  | < .001          | 6.62    | 6.72  | 1.56*     | 0.02 |
| 1975-1971     | Intercepts                  | 6.04     | 0.02 | 321.91  | < .001          | 6.00    | 6.08  | 1.56*     | 0.02 |
| 1970-1966     | freely                      | 5.35     | 0.02 | 310.18  | < .001          | 5.32    | 5.38  | 1.56*     | 0.02 |
| 1965-1961     | estimated                   | 4.73     | 0.02 | 264.83  | < .001          | 4.70    | 4.77  | 1.56*     | 0.02 |
| 1960-1956     |                             | 4.20     | 0.02 | 198.56  | < .001          | 4.16    | 4.25  | 1.56*     | 0.02 |
| 1955-1951     |                             | 3.64     | 0.03 | 126.67  | < .001          | 3.58    | 3.69  | 1.56*     | 0.02 |
| 1950-1946     |                             | 3.02     | 0.05 | 65.38   | < .001          | 2.93    | 3.11  | 1.56*     | 0.02 |
| 1945-1941     |                             | 2.53     | 0.06 | 40.30   | < .001          | 2.40    | 2.65  | 1.56*     | 0.02 |
| 1940-1936     |                             | 2.03     | 0.09 | 23.13   | < .001          | 1.86    | 2.20  | 1.56*     | 0.02 |
| All cohorts   | Linear slope constrained    | 1.04     | 0.01 | 86.12   | < .001          | 1.01    | 1.06  | 0.10*     | 0.01 |
| All cohorts   | Quadratic slope constrained | -0.03    | 0.00 | -7.39   | < .001          | -0.04   | -0.02 | 0.00      | 0.00 |

\* *p* < .001

Supplementary Table 4. Mean and standard deviation of “Climate change is real” for each cohort and survey wave

|           |    | Survey Wave (year) |        |        |        |        |        |        |        |        |        |
|-----------|----|--------------------|--------|--------|--------|--------|--------|--------|--------|--------|--------|
|           |    | 1                  | 2      | 3      | 4      | 5      | 6      | 7      | 8      | 9      | 10     |
|           |    | (2009)             | (2010) | (2011) | (2012) | (2013) | (2014) | (2015) | (2016) | (2017) | (2018) |
| 1936-1940 | M  | 5.254              | 5.060  | 5.147  | 5.163  | 5.367  | 5.619  | 5.616  | 5.688  | 5.903  | 5.712  |
|           | SD | 1.786              | 1.925  | 1.749  | 1.761  | 1.752  | 1.447  | 1.516  | 1.484  | 1.400  | 1.661  |
|           | n  | 319                | 251    | 374    | 368    | 341    | 323    | 294    | 288    | 236    | 233    |
| 1941-1945 | M  | 5.123              | 4.974  | 5.144  | 5.216  | 5.331  | 5.585  | 5.592  | 5.775  | 5.860  | 5.899  |
|           | SD | 1.884              | 1.825  | 1.708  | 1.769  | 1.723  | 1.513  | 1.559  | 1.518  | 1.506  | 1.557  |
|           | n  | 423                | 340    | 561    | 658    | 637    | 617    | 576    | 587    | 506    | 583    |
| 1946-1950 | M  | 5.193              | 5.056  | 5.208  | 5.199  | 5.360  | 5.511  | 5.594  | 5.783  | 5.875  | 5.889  |
|           | SD | 1.745              | 1.682  | 1.750  | 1.769  | 1.676  | 1.591  | 1.566  | 1.485  | 1.439  | 1.606  |
|           | n  | 618                | 463    | 735    | 1048   | 1093   | 1066   | 999    | 1033   | 901    | 994    |
| 1951-1955 | M  | 5.297              | 5.332  | 5.240  | 5.329  | 5.471  | 5.574  | 5.698  | 5.887  | 5.965  | 5.969  |
|           | SD | 1.776              | 1.641  | 1.707  | 1.698  | 1.705  | 1.552  | 1.515  | 1.480  | 1.432  | 1.520  |
|           | n  | 656                | 494    | 762    | 1175   | 1659   | 1555   | 1416   | 2433   | 1957   | 5169   |
| 1956-1960 | M  | 5.473              | 5.363  | 5.423  | 5.525  | 5.537  | 5.639  | 5.747  | 5.929  | 6.018  | 6.002  |
|           | SD | 1.634              | 1.621  | 1.566  | 1.610  | 1.658  | 1.507  | 1.485  | 1.407  | 1.407  | 1.481  |
|           | n  | 727                | 535    | 795    | 1334   | 2642   | 2278   | 2100   | 3265   | 2616   | 7152   |
| 1961-1965 | M  | 5.317              | 5.272  | 5.339  | 5.422  | 5.549  | 5.662  | 5.772  | 5.924  | 5.992  | 6.022  |
|           | SD | 1.654              | 1.646  | 1.595  | 1.611  | 1.602  | 1.462  | 1.441  | 1.379  | 1.360  | 1.445  |
|           | n  | 742                | 525    | 776    | 1287   | 2489   | 2219   | 1966   | 3064   | 2352   | 6560   |
| 1966-1970 | M  | 5.496              | 5.312  | 5.480  | 5.581  | 5.632  | 5.742  | 5.846  | 6.007  | 6.076  | 6.108  |
|           | SD | 1.558              | 1.625  | 1.527  | 1.472  | 1.561  | 1.410  | 1.358  | 1.335  | 1.299  | 1.366  |
|           | n  | 740                | 481    | 646    | 1083   | 2163   | 1850   | 1648   | 2565   | 1984   | 5376   |
| 1971-1975 | M  | 5.517              | 5.418  | 5.601  | 5.671  | 5.690  | 5.818  | 5.931  | 6.082  | 6.168  | 6.234  |
|           | SD | 1.605              | 1.533  | 1.417  | 1.482  | 1.523  | 1.396  | 1.292  | 1.286  | 1.248  | 1.290  |
|           | n  | 582                | 376    | 524    | 894    | 1842   | 1565   | 1350   | 2184   | 1661   | 4695   |
| 1976-1980 | M  | 5.666              | 5.586  | 5.694  | 5.853  | 5.838  | 5.904  | 6.072  | 6.178  | 6.250  | 6.326  |
|           | SD | 1.498              | 1.391  | 1.345  | 1.293  | 1.412  | 1.314  | 1.228  | 1.177  | 1.139  | 1.183  |
|           | n  | 467                | 266    | 421    | 734    | 1434   | 1182   | 1012   | 1730   | 1282   | 3806   |
| 1981-1985 | M  | 5.419              | 5.404  | 5.730  | 5.737  | 5.709  | 5.956  | 6.070  | 6.261  | 6.333  | 6.352  |
|           | SD | 1.600              | 1.422  | 1.302  | 1.354  | 1.425  | 1.239  | 1.186  | 1.111  | 1.092  | 1.184  |
|           | n  | 363                | 183    | 315    | 520    | 1077   | 863    | 727    | 1326   | 969    | 3320   |
| 1986-1990 | M  | 5.504              | 5.536  | 5.725  | 5.655  | 5.766  | 5.977  | 6.143  | 6.283  | 6.352  | 6.378  |
|           | SD | 1.504              | 1.382  | 1.293  | 1.423  | 1.416  | 1.253  | 1.179  | 1.123  | 1.055  | 1.147  |
|           | n  | 377                | 183    | 436    | 620    | 1079   | 857    | 704    | 1234   | 926    | 3079   |
| 1991-1995 | M  | 5.729              | 5.357  | 5.721  | 5.500  | 5.830  | 6.042  | 6.210  | 6.348  | 6.455  | 6.462  |
|           | SD | 1.526              | 1.569  | 1.379  | 1.480  | 1.322  | 1.200  | 1.146  | 1.107  | 0.996  | 1.057  |
|           | n  | 48                 | 28     | 154    | 358    | 822    | 598    | 491    | 977    | 673    | 2506   |
| Total     | M  | 5.393              | 5.286  | 5.407  | 5.483  | 5.602  | 5.730  | 5.836  | 6.017  | 6.091  | 6.142  |
|           | SD | 1.664              | 1.639  | 1.583  | 1.593  | 1.578  | 1.440  | 1.408  | 1.344  | 1.317  | 1.372  |
|           | N  | 6062               | 4125   | 6499   | 10079  | 17278  | 14973  | 13283  | 20686  | 16063  | 43473  |

Supplementary Table 5. Mean and standard deviation of “Climate change is caused by humans” for each cohort and survey wave

|           |    | Survey Wave (year) |        |        |        |        |        |        |        |        |        |
|-----------|----|--------------------|--------|--------|--------|--------|--------|--------|--------|--------|--------|
|           |    | 1                  | 2      | 3      | 4      | 5      | 6      | 7      | 8      | 9      | 10     |
|           |    | (2009)             | (2010) | (2011) | (2012) | (2013) | (2014) | (2015) | (2016) | (2017) | (2018) |
| 1936-1940 | M  | 4.671              | 4.380  | 4.303  | 4.411  | 4.581  | 4.783  | 4.842  | 5.038  | 5.162  | 5.068  |
|           | SD | 1.851              | 1.931  | 1.887  | 1.797  | 1.839  | 1.706  | 1.697  | 1.676  | 1.626  | 1.753  |
|           | n  | 316                | 250    | 370    | 360    | 339    | 322    | 291    | 289    | 234    | 235    |
| 1941-1945 | M  | 4.456              | 4.453  | 4.458  | 4.477  | 4.614  | 4.775  | 4.915  | 5.046  | 5.070  | 5.260  |
|           | SD | 1.916              | 1.767  | 1.829  | 1.805  | 1.813  | 1.759  | 1.730  | 1.706  | 1.730  | 1.707  |
|           | n  | 419                | 340    | 552    | 652    | 637    | 609    | 576    | 582    | 501    | 580    |
| 1946-1950 | M  | 4.536              | 4.468  | 4.455  | 4.538  | 4.701  | 4.902  | 4.943  | 5.192  | 5.229  | 5.249  |
|           | SD | 1.801              | 1.774  | 1.827  | 1.769  | 1.790  | 1.713  | 1.766  | 1.659  | 1.657  | 1.763  |
|           | n  | 616                | 457    | 728    | 1044   | 1095   | 1060   | 990    | 1028   | 892    | 993    |
| 1951-1955 | M  | 4.692              | 4.684  | 4.646  | 4.654  | 4.896  | 5.052  | 5.216  | 5.342  | 5.417  | 5.380  |
|           | SD | 1.834              | 1.749  | 1.746  | 1.798  | 1.775  | 1.680  | 1.693  | 1.631  | 1.628  | 1.739  |
|           | n  | 650                | 490    | 758    | 1163   | 1657   | 1549   | 1411   | 2430   | 1955   | 5150   |
| 1956-1960 | M  | 4.895              | 4.787  | 4.806  | 4.902  | 4.996  | 5.141  | 5.243  | 5.429  | 5.466  | 5.451  |
|           | SD | 1.730              | 1.775  | 1.724  | 1.727  | 1.763  | 1.635  | 1.649  | 1.596  | 1.598  | 1.675  |
|           | n  | 722                | 531    | 788    | 1325   | 2635   | 2268   | 2096   | 3260   | 2606   | 7122   |
| 1961-1965 | M  | 4.812              | 4.752  | 4.772  | 4.873  | 5.031  | 5.187  | 5.316  | 5.453  | 5.493  | 5.504  |
|           | SD | 1.684              | 1.730  | 1.710  | 1.712  | 1.708  | 1.601  | 1.574  | 1.530  | 1.537  | 1.645  |
|           | n  | 735                | 521    | 772    | 1284   | 2477   | 2213   | 1960   | 3056   | 2344   | 6544   |
| 1966-1970 | M  | 4.887              | 4.822  | 4.936  | 5.010  | 5.142  | 5.248  | 5.400  | 5.571  | 5.605  | 5.612  |
|           | SD | 1.639              | 1.703  | 1.635  | 1.609  | 1.640  | 1.582  | 1.538  | 1.501  | 1.499  | 1.581  |
|           | n  | 736                | 478    | 641    | 1081   | 2161   | 1846   | 1646   | 2560   | 1979   | 5366   |
| 1971-1975 | M  | 5.005              | 5.080  | 5.059  | 5.156  | 5.252  | 5.426  | 5.566  | 5.708  | 5.759  | 5.799  |
|           | SD | 1.660              | 1.639  | 1.572  | 1.627  | 1.629  | 1.508  | 1.468  | 1.449  | 1.437  | 1.501  |
|           | n  | 580                | 376    | 523    | 890    | 1845   | 1561   | 1350   | 2181   | 1658   | 4685   |
| 1976-1980 | M  | 5.157              | 5.136  | 5.190  | 5.279  | 5.407  | 5.467  | 5.643  | 5.802  | 5.902  | 5.890  |
|           | SD | 1.567              | 1.590  | 1.510  | 1.541  | 1.558  | 1.534  | 1.483  | 1.393  | 1.356  | 1.444  |
|           | n  | 460                | 265    | 420    | 731    | 1430   | 1181   | 1014   | 1730   | 1284   | 3796   |
| 1981-1985 | M  | 4.995              | 4.951  | 5.283  | 5.235  | 5.356  | 5.587  | 5.753  | 5.929  | 6.011  | 5.962  |
|           | SD | 1.619              | 1.569  | 1.478  | 1.462  | 1.558  | 1.457  | 1.366  | 1.316  | 1.289  | 1.406  |
|           | n  | 364                | 184    | 315    | 515    | 1074   | 863    | 728    | 1322   | 965    | 3322   |
| 1986-1990 | M  | 4.861              | 4.832  | 5.194  | 5.118  | 5.281  | 5.581  | 5.727  | 5.887  | 5.918  | 5.926  |
|           | SD | 1.618              | 1.616  | 1.504  | 1.573  | 1.563  | 1.418  | 1.430  | 1.342  | 1.335  | 1.415  |
|           | n  | 375                | 184    | 434    | 620    | 1078   | 857    | 704    | 1234   | 924    | 3076   |
| 1991-1995 | M  | 4.702              | 4.750  | 4.890  | 4.992  | 5.244  | 5.629  | 5.814  | 5.930  | 6.010  | 6.038  |
|           | SD | 1.587              | 1.777  | 1.599  | 1.481  | 1.559  | 1.354  | 1.365  | 1.343  | 1.291  | 1.308  |
|           | n  | 47                 | 28     | 154    | 357    | 823    | 596    | 494    | 977    | 671    | 2501   |
| Total     | M  | 4.816              | 4.745  | 4.795  | 4.882  | 5.082  | 5.238  | 5.363  | 5.556  | 5.598  | 5.644  |
|           | SD | 1.729              | 1.739  | 1.716  | 1.700  | 1.696  | 1.605  | 1.598  | 1.531  | 1.530  | 1.593  |
|           | N  | 6020               | 4104   | 6455   | 10022  | 17251  | 14925  | 13260  | 20649  | 16013  | 43370  |

### **Examination of gender differences in climate change generation gap**

This section of the Supplementary Material describes the results of additional analyses examining whether a generation gap in climate change beliefs would emerge when considering women and men separately. Supplementary Table 6 shows sample size and gender distribution was comparable for both climate change beliefs and across cohorts.

Results from the age-based trajectory model indicate that agreement with the reality of climate change was higher at all age groups than agreement with anthropogenic climate change for both women and men. This pattern of higher agreement levels for the reality of climate change than for anthropogenic climate change is evident when contrasting the darker lines from Supplementary Figures 1 to 4.

Agreement levels regarding both the reality of climate change and its human cause followed a U-shaped trajectory across the adult lifespan for both women and men (see Supplementary Figures 1-4). Results in Supplementary Table 7 confirm that the longitudinal changes in climate change beliefs did not follow a linear increase but a quadratic change trajectory for both climate change beliefs, as indicated by the statistically significant quadratic slopes ( $p$ -values  $< .001$ ) for both women and men. There was one exception to this: women also showed a linear increase in the reality of climate change ( $p$ -value =  $.001$ ). Overall, respondents' belief in the reality of climate change and belief in anthropogenic climate change was comparatively higher in early adulthood, lower in middle adulthood, at which point the pattern became higher in older ages; and this was equally observed for women and men.

Results in Supplementary Table 8 indicate that forcing a normative ageing effect to the data was less fitting than a cohort-based trajectory model allowing variability in each of the 12 five-year birth cohorts. Chi-square results in Supplementary Table 9 comparing the two models clearly indicate that the age-based trajectory model had relatively worse fit (reflected by higher chi-square values) for all birth cohorts compared to the cohort-based trajectory model.

We then examined the multi-group cohort sequential models estimating mean-level change over the ten annual assessments in each of the 12 five-year birth cohorts separately for women and men. Similar to findings for the overall sample, results indicate that agreement levels about the reality of climate change and human causation are increasing for people across all age cohorts at about the same rate, but older people are starting from a lower level of belief. As depicted in Supplementary Figure 1, all female age cohorts showed longitudinal patterns of increase for belief in the reality of climate change, except for the 1945-1941 cohort. For men, respondents' belief in the reality of climate change had longitudinal patterns of increase for just over half the age cohorts, except for the 1985-1981, 1960-1956, 1950-1946, 1945-1941 and 1940-1936 cohorts which shows longitudinal stability in agreement levels (see Supplementary Figure 2). Given the visual similarities in change trajectories, we also fitted a model to these data that formally tested whether each birth cohort's change trajectories were equal over time, while allowing their intercepts to vary. Results in Supplementary Table 8 indicate that this model was commensurate with the cohort-

unconstrained model, suggesting that beliefs in the reality of climate change had a similar growth rate for all birth cohorts over ten years amongst women and men.

Respondents' belief in the human causation of climate change had longitudinal patterns of increase for over half the female age cohorts, except for the 1990-1986, 1985-1981, 1950-1946 and 1945-1941 cohorts which shows longitudinal stability in agreement levels (see Supplementary Figure 3). As depicted in Supplementary Figure 4, most male age cohorts showed longitudinal patterns of increase for belief in the reality of climate change, except for the 1985-1981, 1950-1946 and 1940-1936 cohorts. Again, we also fitted a model that formally tested whether each birth cohort's change trajectories were equal over time, while allowing their intercepts to vary. Similar to findings for climate reality, results in Supplementary Table 8 suggest that beliefs in human causation had a similar growth rate for all birth cohorts over ten years amongst women and men. Supplementary Tables 10-13 provide more information about these models.

Supplementary Table 6. Age and sample sizes by birth cohort for “Climate change is real” (reality) and “Climate change is caused by humans” (cause) by gender. The youngest age in each birth cohort was taken as indication of age at Time 1.

| Birth cohorts | Age at<br>Time 1<br>(~2009) | Age at<br>Time 10<br>(~2018) | Sample Sizes    |       |               |       |
|---------------|-----------------------------|------------------------------|-----------------|-------|---------------|-------|
|               |                             |                              | Climate Reality |       | Climate Cause |       |
|               |                             |                              | Women           | Men   | Women         | Men   |
| 1995-1991     | 18                          | 27                           | 2302            | 1082  | 2299          | 1080  |
| 1990-1986     | 19                          | 28                           | 2888            | 1399  | 2890          | 1395  |
| 1985-1981     | 24                          | 33                           | 2973            | 1416  | 2974          | 1414  |
| 1980-1976     | 29                          | 38                           | 3305            | 1752  | 3301          | 1751  |
| 1975-1971     | 34                          | 43                           | 3972            | 2116  | 3968          | 2115  |
| 1970-1966     | 39                          | 48                           | 4424            | 2570  | 4413          | 2564  |
| 1965-1961     | 44                          | 53                           | 5068            | 3136  | 5054          | 3137  |
| 1960-1956     | 49                          | 58                           | 5217            | 3594  | 5202          | 3589  |
| 1955-1951     | 54                          | 63                           | 3548            | 2713  | 3541          | 2701  |
| 1950-1946     | 59                          | 68                           | 867             | 697   | 867           | 696   |
| 1945-1941     | 64                          | 73                           | 494             | 442   | 494           | 439   |
| 1940-1936     | 69                          | 78                           | 245             | 250   | 246           | 249   |
| Total n       | —                           | —                            | 35303           | 21167 | 35249         | 21130 |
| Total N       |                             |                              | 56470           |       | 56379         |       |



Supplementary Table 7. Parameter coefficients for the cohort-constrained models for “Climate change is real” (reality) and “Climate change is caused by humans” (cause) estimating the change trajectory from ages 18 to 78 by gender

|       |                 | Climate Reality |      |         |                 |         |      |           |      |
|-------|-----------------|-----------------|------|---------|-----------------|---------|------|-----------|------|
|       |                 | Means           |      |         |                 | 95% CIs |      | Variances |      |
|       |                 | Estimate        | SE   | Est./SE | <i>p</i> -value | LB      | UB   | Est       | SE   |
| Women | Intercept       | 6.01            | 0.01 | 676.54  | < .001          | 5.99    | 6.02 | 1.18**    | 0.01 |
|       | Linear slope    | 0.02            | 0.01 | 3.42    | .001            | 0.01    | 0.03 | 0.06**    | 0.01 |
|       | Quadratic slope | 0.03            | 0.00 | 8.08    | < .001          | 0.02    | 0.04 | 0.00      | 0.00 |
| Men   | Intercept       | 5.73            | 0.01 | 495.83  | < .001          | 5.71    | 5.76 | 1.18**    | 0.01 |
|       | Linear slope    | 0.00            | 0.01 | 0.10    | .921            | -0.01   | 0.01 | 0.06**    | 0.01 |
|       | Quadratic slope | 0.04            | 0.00 | 9.94    | < .001          | 0.04    | 0.05 | 0.00      | 0.00 |
|       |                 | Climate Cause   |      |         |                 |         |      |           |      |
|       |                 | Means           |      |         |                 | 95% CIs |      | Variances |      |
|       |                 | Estimate        | SE   | Est./SE | <i>p</i> -value | LB      | UB   | Est       | SE   |
| Women | Intercept       | 5.56            | 0.01 | 557.90  | < .001          | 5.54    | 5.58 | 1.59**    | 0.02 |
|       | Linear slope    | 0.01            | 0.01 | 1.59    | .112            | -0.00   | 0.02 | 0.12**    | 0.01 |
|       | Quadratic slope | 0.02            | 0.00 | 5.48    | < .001          | 0.01    | 0.03 | 0.00      | 0.00 |
| Men   | Intercept       | 5.20            | 0.01 | 401.08  | < .001          | 5.18    | 5.23 | 1.59**    | 0.02 |
|       | Linear slope    | -0.02           | 0.01 | -1.90   | .058            | -0.03   | 0.00 | 0.12**    | 0.01 |
|       | Quadratic slope | 0.03            | 0.01 | 6.95    | < .001          | 0.03    | 0.04 | 0.00      | 0.00 |

\*\*  $p < .001$

Supplementary Table 8. Fit statistics for the age-based and cohort-based trajectory models for each climate change belief for the multigroup gender models

| Belief                          | Model                                        | $\chi^2$ | <i>df</i> | <i>p</i> | $\Delta\chi^2$ | $\Delta df$ | CFI   | $\Delta CFI$ | RMSEA | $\Delta RMSEA$ | SRMR  | $\Delta SRMR$ | AIC       | Sample-size adjusted BIC |
|---------------------------------|----------------------------------------------|----------|-----------|----------|----------------|-------------|-------|--------------|-------|----------------|-------|---------------|-----------|--------------------------|
| Climate Change Reality          | Age-based trajectory (constrained)           | 22456.90 | 1550      | < .001   | —              | —           | 0.725 | —            | 0.076 | —              | 0.227 | —             | 480234.77 | 480292.40                |
|                                 | Cohort-based trajectory (constrained slopes) | 14727.12 | 1528      | < .001   | 7729.78        | 22          | 0.826 | -0.101       | 0.061 | 0.015          | 0.175 | 0.052         | 472548.98 | 472733.41                |
|                                 | Cohort-based trajectory (unconstrained)      | 14432.62 | 1484      | < .001   | 294.50         | 44          | 0.829 | -0.003       | 0.061 | 0.000          | 0.178 | -0.003        | 472342.48 | 472780.50                |
| Climate Change Caused by Humans | Age-based trajectory (constrained)           | 19498.22 | 1550      | < .001   | —              | —           | 0.789 | —            | 0.070 | —              | 0.179 | —             | 500959.15 | 501016.77                |
|                                 | Cohort-based trajectory (constrained slopes) | 10660.34 | 1528      | < .001   | 8837.88        | 22          | 0.893 | -0.104       | 0.050 | 0.020          | 0.130 | 0.049         | 492165.27 | 492349.65                |
|                                 | Cohort-based trajectory (unconstrained)      | 10425.22 | 1484      | < .001   | 235.12         | 44          | 0.895 | -0.002       | 0.051 | -0.001         | 0.131 | -0.001        | 492018.16 | 492456.05                |

$\chi^2$  = chi-square. *df* = degrees of freedom. *p* = *p*-value. CFI = Comparative Fit Index. RMSEA = Root Mean Square Error of Approximation. SRMR = Standardized Root Mean Square Residual. AIC = Akaike Information Criterion. BIC = Bayesian Information Criterion.

Supplementary Table 9. Chi-square ( $\chi^2$ ) contributions and differences of each birth cohort for “Climate change is real” (reality) and “Climate change is caused by humans” (cause) by gender

| Climate Reality |           |           |                   |           |                   |           |           |                   |           |                   |
|-----------------|-----------|-----------|-------------------|-----------|-------------------|-----------|-----------|-------------------|-----------|-------------------|
| Birth cohort    | Women     |           |                   |           |                   | Men       |           |                   |           |                   |
|                 | $\chi^2A$ | $\chi^2B$ | $\chi^2\Delta AB$ | $\chi^2C$ | $\chi^2\Delta BC$ | $\chi^2A$ | $\chi^2B$ | $\chi^2\Delta AB$ | $\chi^2C$ | $\chi^2\Delta BC$ |
| 1995-1991       | 1363      | 909       | 455               | 875       | 34                | 620       | 391       | 229               | 377       | 14                |
| 1990-1986       | 1468      | 883       | 585               | 852       | 31                | 799       | 516       | 284               | 507       | 9                 |
| 1985-1981       | 1563      | 1006      | 557               | 992       | 14                | 567       | 381       | 186               | 378       | 3                 |
| 1980-1976       | 1403      | 961       | 442               | 925       | 35                | 593       | 368       | 225               | 365       | 3                 |
| 1975-1971       | 1352      | 871       | 482               | 841       | 29                | 649       | 449       | 200               | 447       | 2                 |
| 1970-1966       | 1282      | 810       | 472               | 781       | 29                | 737       | 531       | 206               | 528       | 3                 |
| 1965-1961       | 1249      | 750       | 499               | 738       | 12                | 982       | 678       | 303               | 677       | 2                 |
| 1960-1956       | 1147      | 725       | 423               | 694       | 30                | 928       | 655       | 274               | 655       | 0                 |
| 1955-1951       | 1120      | 667       | 453               | 661       | 6                 | 652       | 506       | 146               | 503       | 3                 |
| 1950-1946       | 907       | 510       | 397               | 496       | 15                | 816       | 564       | 252               | 565       | -1                |
| 1945-1941       | 524       | 289       | 235               | 285       | 5                 | 727       | 518       | 209               | 514       | 4                 |
| 1940-1936       | 471       | 346       | 125               | 332       | 14                | 537       | 444       | 92                | 445       | 0                 |

  

| Climate Cause |           |           |                   |           |                   |           |           |                   |           |                   |
|---------------|-----------|-----------|-------------------|-----------|-------------------|-----------|-----------|-------------------|-----------|-------------------|
| Birth cohort  | Women     |           |                   |           |                   | Men       |           |                   |           |                   |
|               | $\chi^2A$ | $\chi^2B$ | $\chi^2\Delta AB$ | $\chi^2C$ | $\chi^2\Delta BC$ | $\chi^2A$ | $\chi^2B$ | $\chi^2\Delta AB$ | $\chi^2C$ | $\chi^2\Delta BC$ |
| 1995-1991     | 997       | 475       | 522               | 437       | 38                | 540       | 299       | 242               | 268       | 30                |
| 1990-1986     | 1261      | 604       | 657               | 591       | 13                | 743       | 403       | 340               | 379       | 24                |
| 1985-1981     | 1207      | 629       | 579               | 627       | 1                 | 481       | 277       | 204               | 277       | 1                 |
| 1980-1976     | 1185      | 637       | 548               | 622       | 15                | 537       | 334       | 203               | 327       | 7                 |
| 1975-1971     | 1141      | 570       | 571               | 557       | 13                | 748       | 498       | 251               | 494       | 4                 |
| 1970-1966     | 1119      | 575       | 543               | 570       | 5                 | 723       | 474       | 249               | 471       | 3                 |
| 1965-1961     | 1091      | 517       | 575               | 513       | 4                 | 789       | 511       | 277               | 507       | 4                 |
| 1960-1956     | 983       | 453       | 531               | 439       | 13                | 811       | 493       | 318               | 493       | 0                 |
| 1955-1951     | 1030      | 446       | 584               | 441       | 6                 | 700       | 492       | 208               | 490       | 2                 |
| 1950-1946     | 925       | 440       | 485               | 426       | 14                | 617       | 353       | 264               | 349       | 4                 |
| 1945-1941     | 567       | 291       | 276               | 287       | 4                 | 473       | 281       | 192               | 267       | 14                |
| 1940-1936     | 493       | 395       | 98                | 387       | 9                 | 336       | 213       | 123               | 205       | 9                 |

Chi-square ( $\chi^2$ ) contribution differences ( $\chi^2\Delta$ ) between the key competing models are shown in bold.  $\chi^2A$  = Chi-square contribution of the age-based (constrained) model.  $\chi^2B$  = Chi-square contribution of the intermediate model where intercepts are freely estimated but slopes are constrained.  $\chi^2C$  = Chi-square contribution of the cohort-based (unconstrained) model.

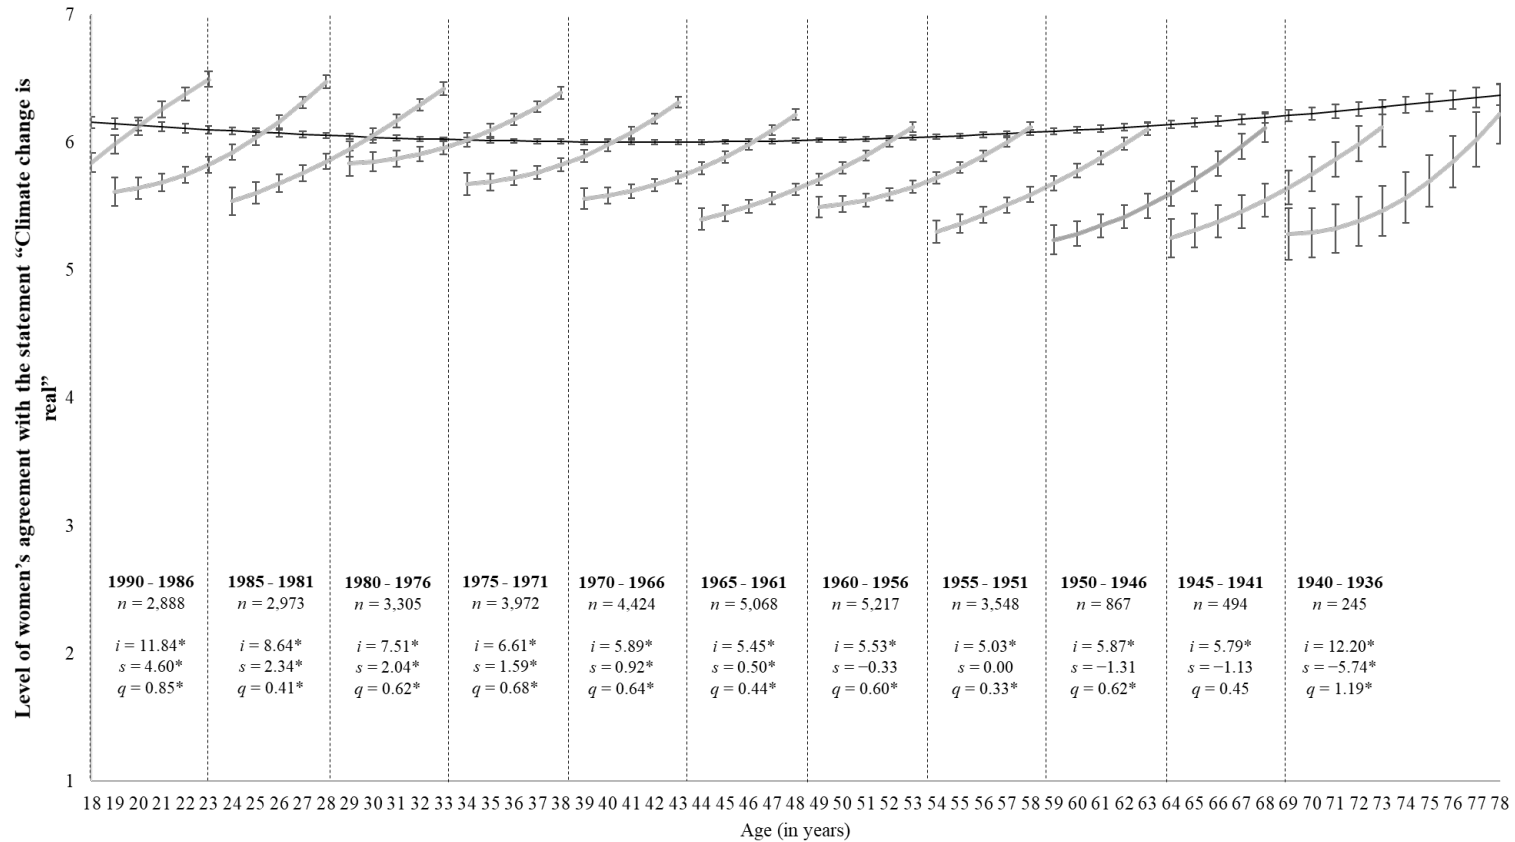

**Supplementary Figure 1. Belief in the reality of climate change across age and five-year birth cohorts among women.** Model-implied change trajectories in the level of women’s agreement with the statement “Climate change is real” (dark line) from ages 18 to 78. The lines within each 5-year cohort represent longitudinal change in climate reality estimating latent intercepts ( $i$ ) as well as linear ( $s$ ) and quadratic ( $q$ ) slopes. The estimations are based on the mean-levels of climate reality (y-axis) across age and assessments (x-axis) with 95% confidence intervals presented as error bars around each point estimate (\*  $p < .05$ ). Due to graphical space constraints, details for the 1995-1991 cohort are not shown but are:  $n = 2302$ ,  $i = 7.15^*$ ,  $s = -0.53$ ,  $q = -0.38$ . Respondents expressed their levels of disagreement-agreement on a 7-point answer scale anchored by 1 (strongly disagree) and 7 (strongly agree).

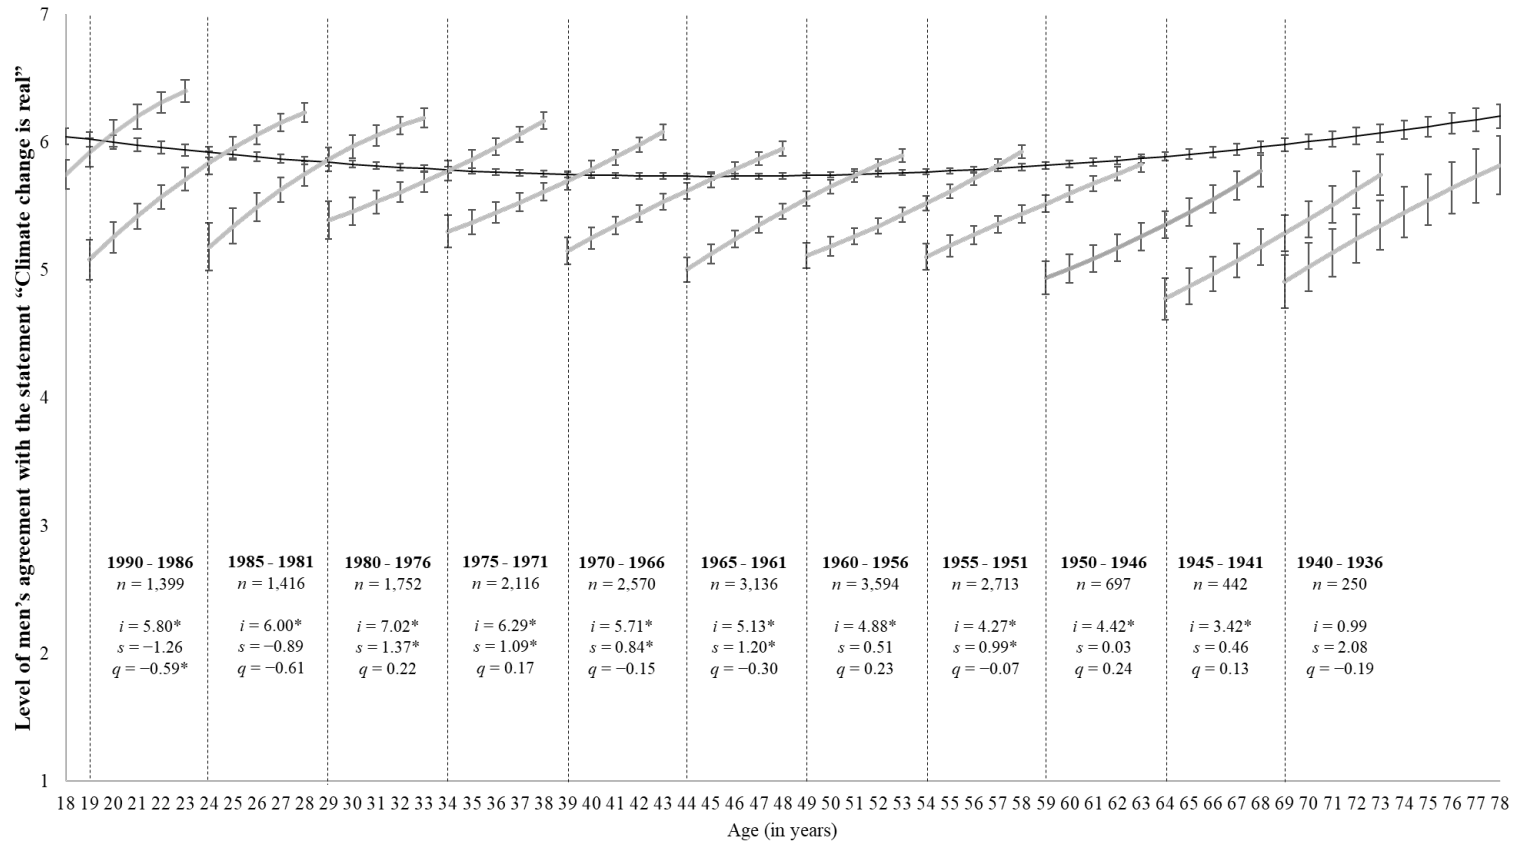

**Supplementary Figure 2. Belief in the reality of climate change across age and five-year birth cohorts among men.** Model-implied change trajectories in the level of men’s agreement with the statement “Climate change is real” (dark line) from ages 18 to 78. The lines within each 5-year cohort represent longitudinal change in climate reality estimating latent intercepts ( $i$ ) as well as linear ( $s$ ) and quadratic ( $q$ ) slopes. The estimations are based on the mean-levels of climate reality (y-axis) across age and assessments (x-axis) with 95% confidence intervals presented as error bars around each point estimate (\*  $p < .05$ ). Due to graphical space constraints, details for the 1995-1991 cohort are not shown but are:  $n = 1082$ ,  $i = 3.30$ ,  $s = -3.62$ ,  $q = -1.01^*$ . Respondents expressed their levels of disagreement-agreement on a 7-point answer scale anchored by 1 (strongly disagree) and 7 (strongly agree).

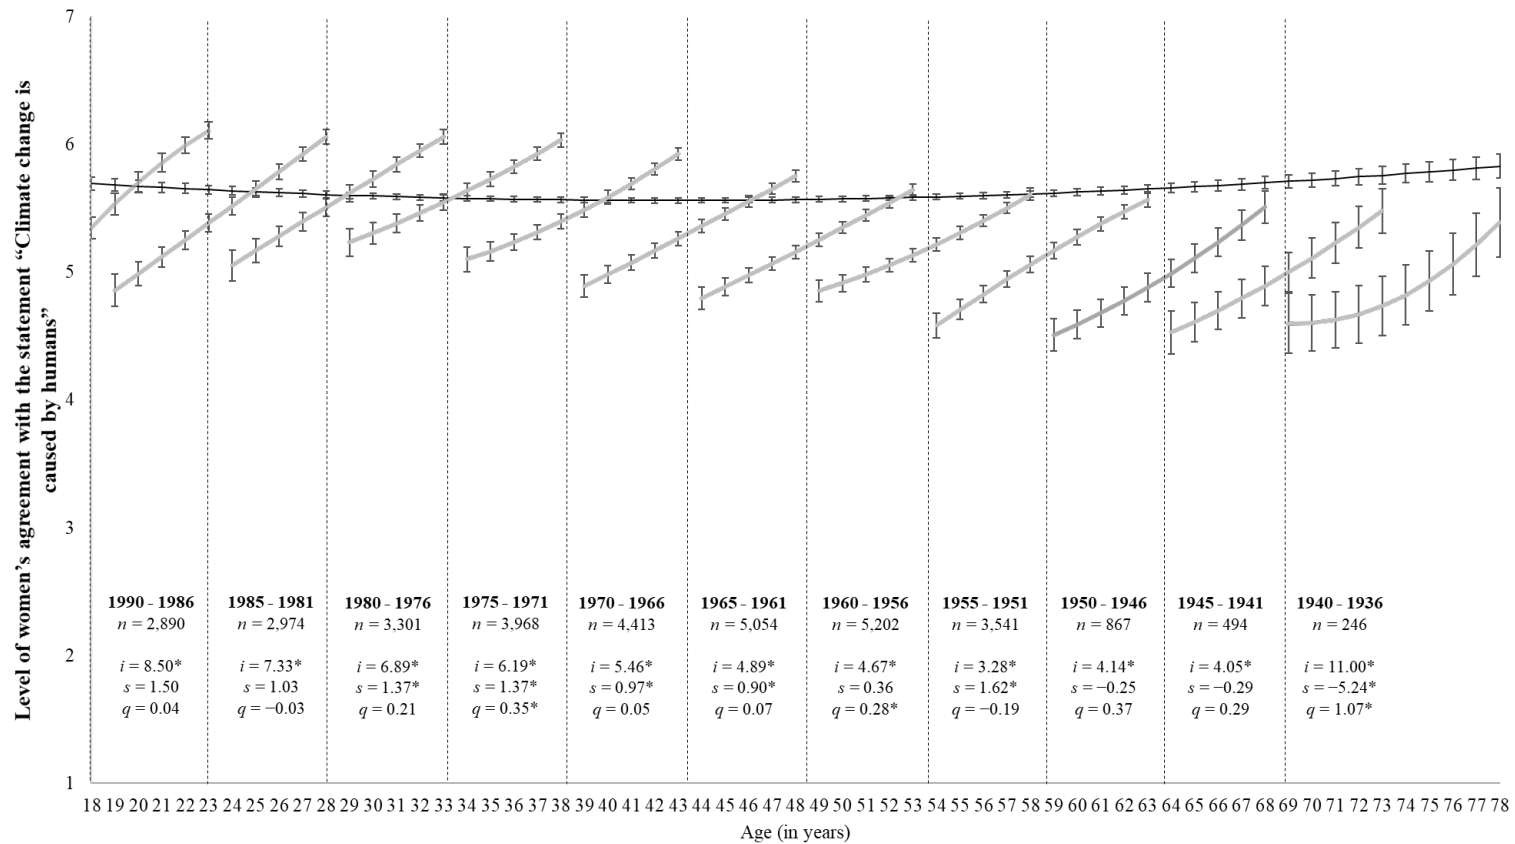

**Supplementary Figure 3. Belief in anthropogenic climate change across age and five-year birth cohorts among women.** Model-implied change trajectories in the level of women’s agreement with the statement “Climate change is caused by humans” (dark line) from ages 18 to 78. The lines within each 5-year cohort represent longitudinal change in climate cause belief estimating latent intercepts ( $i$ ) as well as linear ( $s$ ) and quadratic ( $q$ ) slopes. The estimations are based on the mean-levels of climate cause belief (y-axis) across age and assessments (x-axis) with 95% confidence intervals presented as error bars around each point estimate ( $* p < .05$ ). Due to graphical space constraints, details for the 1995-1991 cohort are not shown but are:  $n = 2299$ ,  $i = 4.20$ ,  $s = -2.82$ ,  $q = -0.89^*$ . Respondents expressed their levels of disagreement-agreement on a 7-point answer scale anchored by 1 (strongly disagree) and 7 (strongly agree).

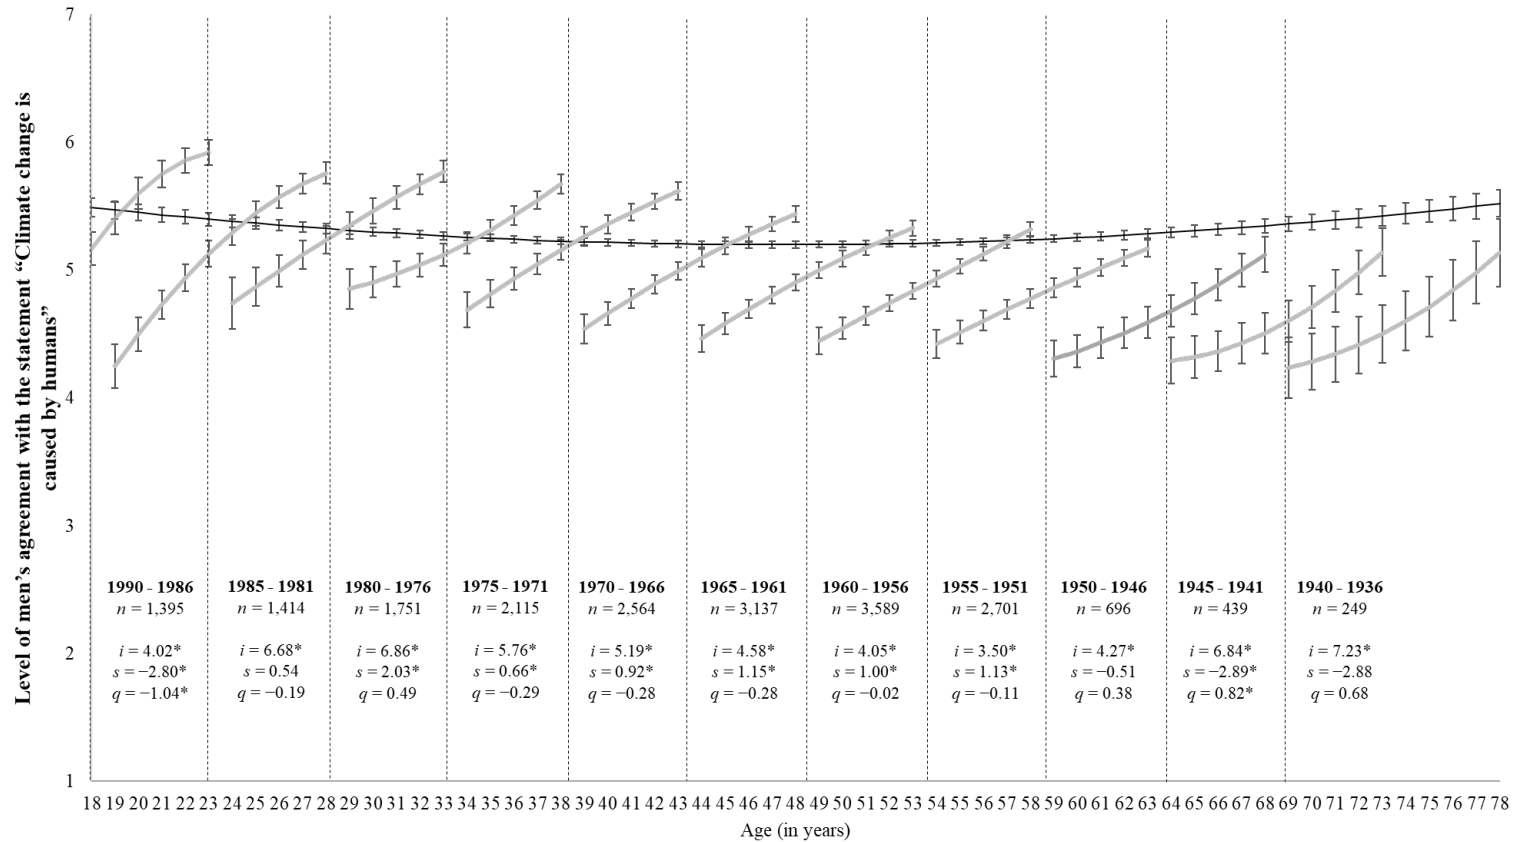

**Supplementary Figure 4. Belief in anthropogenic climate change across age and five-year birth cohorts among men.** Model-implied change trajectories in the level of men’s agreement with the statement “Climate change is caused by humans” (dark line) from ages 18 to 78. The lines within each 5-year cohort represent longitudinal change in climate cause belief estimating latent intercepts ( $i$ ) as well as linear ( $s$ ) and quadratic ( $q$ ) slopes. The estimations are based on the mean-levels of climate cause belief (y-axis) across age and assessments (x-axis) with 95% confidence intervals presented as error bars around each point estimate ( $* p < .05$ ). Due to graphical space constraints, details for the 1995-1991 cohort are not shown but are:  $n = 1080$ ,  $i = -4.06$ ,  $s = -9.46^*$ ,  $q = -2.24^*$ . Respondents expressed their levels of disagreement-agreement on a 7-point answer scale anchored by 1 (strongly disagree) and 7 (strongly agree).

Supplementary Table 10. Estimates for the cohort-based unconstrained models for “Climate change is real” (reality) for women and men

|              |          | Climate Reality |      |         |                 |       |       |        |      |         |                 |       |       |
|--------------|----------|-----------------|------|---------|-----------------|-------|-------|--------|------|---------|-----------------|-------|-------|
|              |          | Women           |      |         |                 |       |       | Men    |      |         |                 |       |       |
|              |          | 95% CI          |      |         |                 |       |       | 95% CI |      |         |                 |       |       |
| Birth cohort |          | Est.            | SE   | Est./SE | <i>p</i> -value | LB    | UB    | Est.   | SE   | Est./SE | <i>p</i> -value | LB    | UB    |
| 1995-1991    | <i>i</i> | 7.15            | 2.04 | 3.51    | < .001          | 3.16  | 11.14 | 3.30   | 3.14 | 1.05    | .293            | -2.85 | 9.45  |
|              | <i>s</i> | -0.53           | 1.64 | -0.32   | .747            | -3.74 | 2.68  | -3.62  | 2.53 | -1.43   | .152            | -8.58 | 1.33  |
|              | <i>q</i> | -0.38           | 0.33 | -1.15   | .251            | -1.02 | 0.27  | -1.01  | 0.50 | -1.99   | .046            | -1.99 | -0.02 |
| 1990-1986    | <i>i</i> | 11.84           | 0.84 | 14.11   | < .001          | 10.20 | 13.49 | 5.80   | 1.19 | 4.86    | < .001          | 3.46  | 8.14  |
|              | <i>s</i> | 4.60            | 0.83 | 5.56    | < .001          | 2.98  | 6.21  | -1.26  | 1.17 | -1.08   | .282            | -3.55 | 1.04  |
|              | <i>q</i> | 0.85            | 0.20 | 4.24    | < .001          | 0.46  | 1.24  | -0.59  | 0.28 | -2.10   | .036            | -1.14 | -0.04 |
| 1985-1981    | <i>i</i> | 8.64            | 0.45 | 19.13   | < .001          | 7.75  | 9.52  | 6.00   | 0.74 | 8.13    | < .001          | 4.56  | 7.45  |
|              | <i>s</i> | 2.34            | 0.59 | 3.94    | < .001          | 1.18  | 3.50  | -0.89  | 0.98 | -0.92   | .360            | -2.81 | 1.02  |
|              | <i>q</i> | 0.41            | 0.19 | 2.18    | .029            | 0.04  | 0.78  | -0.61  | 0.31 | -1.95   | .051            | -1.22 | 0.00  |
| 1980-1976    | <i>i</i> | 7.51            | 0.18 | 41.12   | < .001          | 7.15  | 7.87  | 7.02   | 0.27 | 26.38   | < .001          | 6.50  | 7.55  |
|              | <i>s</i> | 2.04            | 0.36 | 5.61    | < .001          | 1.32  | 2.75  | 1.37   | 0.53 | 2.59    | .010            | 0.33  | 2.41  |
|              | <i>q</i> | 0.62            | 0.17 | 3.67    | < .001          | 0.29  | 0.95  | 0.22   | 0.25 | 0.90    | .369            | -0.26 | 0.71  |
| 1975-1971    | <i>i</i> | 6.61            | 0.04 | 153.38  | < .001          | 6.52  | 6.69  | 6.29   | 0.06 | 103.23  | < .001          | 6.17  | 6.41  |
|              | <i>s</i> | 1.59            | 0.17 | 9.17    | < .001          | 1.25  | 1.94  | 1.09   | 0.25 | 4.38    | < .001          | 0.60  | 1.58  |
|              | <i>q</i> | 0.68            | 0.15 | 4.57    | < .001          | 0.39  | 0.97  | 0.17   | 0.21 | 0.81    | .419            | -0.25 | 0.59  |
| 1970-1966    | <i>i</i> | 5.89            | 0.02 | 259.38  | < .001          | 5.84  | 5.93  | 5.71   | 0.03 | 187.45  | < .001          | 5.65  | 5.77  |
|              | <i>s</i> | 0.92            | 0.04 | 20.84   | < .001          | 0.83  | 1.01  | 0.84   | 0.06 | 13.96   | < .001          | 0.73  | 0.96  |
|              | <i>q</i> | 0.64            | 0.14 | 4.62    | < .001          | 0.37  | 0.91  | -0.15  | 0.18 | -0.80   | .425            | -0.50 | 0.21  |
| 1965-1961    | <i>i</i> | 5.45            | 0.03 | 170.14  | < .001          | 5.38  | 5.51  | 5.13   | 0.04 | 130.84  | < .001          | 5.05  | 5.20  |
|              | <i>s</i> | 0.50            | 0.12 | 4.04    | < .001          | 0.26  | 0.74  | 1.20   | 0.15 | 8.12    | < .001          | 0.91  | 1.50  |
|              | <i>q</i> | 0.44            | 0.13 | 3.26    | .001            | 0.17  | 0.70  | -0.30  | 0.17 | -1.81   | .071            | -0.62 | 0.03  |
| 1960-1956    | <i>i</i> | 5.53            | 0.11 | 49.50   | < .001          | 5.31  | 5.75  | 4.88   | 0.14 | 35.04   | < .001          | 4.60  | 5.15  |
|              | <i>s</i> | -0.33           | 0.25 | -1.34   | .179            | -0.82 | 0.15  | 0.51   | 0.31 | 1.66    | .098            | -0.09 | 1.11  |
|              | <i>q</i> | 0.60            | 0.13 | 4.61    | < .001          | 0.35  | 0.86  | 0.23   | 0.16 | 1.43    | .153            | -0.09 | 0.55  |
| 1955-1951    | <i>i</i> | 5.03            | 0.29 | 17.10   | < .001          | 4.46  | 5.61  | 4.27   | 0.35 | 12.33   | < .001          | 3.59  | 4.95  |
|              | <i>s</i> | 0.00            | 0.43 | 0.01    | .995            | -0.83 | 0.84  | 0.99   | 0.50 | 1.97    | .049            | 0.01  | 1.98  |
|              | <i>q</i> | 0.33            | 0.15 | 2.21    | .027            | 0.04  | 0.62  | -0.07  | 0.18 | -0.39   | .695            | -0.42 | 0.28  |
| 1950-1946    | <i>i</i> | 5.87            | 0.66 | 8.95    | < .001          | 4.58  | 7.15  | 4.42   | 0.73 | 6.05    | < .001          | 2.99  | 5.85  |
|              | <i>s</i> | -1.31           | 0.71 | -1.86   | .063            | -2.70 | 0.07  | 0.03   | 0.79 | 0.04    | .968            | -1.51 | 1.57  |
|              | <i>q</i> | 0.62            | 0.19 | 3.31    | .001            | 0.25  | 0.99  | 0.24   | 0.21 | 1.17    | .243            | -0.17 | 0.65  |
| 1945-1941    | <i>i</i> | 5.79            | 1.35 | 4.28    | < .001          | 3.14  | 8.44  | 3.42   | 1.47 | 2.33    | .020            | 0.55  | 6.30  |
|              | <i>s</i> | -1.13           | 1.15 | -0.98   | .326            | -3.39 | 1.13  | 0.46   | 1.25 | 0.37    | .711            | -1.98 | 2.90  |
|              | <i>q</i> | 0.45            | 0.24 | 1.84    | .065            | -0.03 | 0.92  | 0.13   | 0.26 | 0.50    | .614            | -0.38 | 0.64  |
| 1940-1936    | <i>i</i> | 12.20           | 2.64 | 4.61    | < .001          | 7.02  | 17.38 | 0.99   | 2.73 | 0.36    | .716            | -4.35 | 6.34  |
|              | <i>s</i> | -5.74           | 1.87 | -3.06   | .002            | -9.41 | -2.07 | 2.08   | 1.92 | 1.08    | .279            | -1.69 | 5.85  |
|              | <i>q</i> | 1.19            | 0.33 | 3.62    | < .001          | 0.55  | 1.84  | -0.19  | 0.34 | -0.56   | .578            | -0.85 | 0.47  |

*i* = intercept, *s* = linear slope, *q* = quadratic slope.



Supplementary Table 11. Estimates for the cohort-based unconstrained models for “Climate change is caused by humans” (cause) for women and men

|              |          | Climate Cause |      |         |                 |        |       |       |      |         |                 |        |       |
|--------------|----------|---------------|------|---------|-----------------|--------|-------|-------|------|---------|-----------------|--------|-------|
|              |          | Women         |      |         |                 |        |       | Men   |      |         |                 |        |       |
| Birth cohort |          | Est           | SE   | Est./SE | <i>p</i> -value | 95% CI |       | Est   | SE   | Est./SE | <i>p</i> -value | 95% CI |       |
|              |          |               |      |         |                 | LB     | UB    |       |      |         |                 | LB     | UB    |
| 1995-1991    | <i>i</i> | 4.20          | 2.16 | 1.94    | .052            | -0.04  | 8.44  | -4.06 | 3.38 | -1.20   | .229            | -10.69 | 2.56  |
|              | <i>s</i> | -2.82         | 1.74 | -1.62   | .105            | -6.23  | 0.59  | -9.46 | 2.72 | -3.48   | .001            | -14.80 | -4.13 |
|              | <i>q</i> | -0.89         | 0.35 | -2.56   | .010            | -1.57  | -0.21 | -2.24 | 0.54 | -4.12   | < .001          | -3.30  | -1.17 |
| 1990-1986    | <i>i</i> | 8.50          | 0.89 | 9.51    | < .001          | 6.75   | 10.25 | 4.02  | 1.27 | 3.16    | .002            | 1.52   | 6.51  |
|              | <i>s</i> | 1.50          | 0.88 | 1.71    | .088            | -0.22  | 3.22  | -2.80 | 1.25 | -2.24   | .025            | -5.24  | -0.35 |
|              | <i>q</i> | 0.04          | 0.21 | 0.18    | .855            | -0.38  | 0.46  | -1.04 | 0.30 | -3.48   | .001            | -1.63  | -0.45 |
| 1985-1981    | <i>i</i> | 7.33          | 0.48 | 15.35   | < .001          | 6.40   | 8.27  | 6.68  | 0.79 | 8.48    | < .001          | 5.14   | 8.23  |
|              | <i>s</i> | 1.03          | 0.63 | 1.64    | .102            | -0.20  | 2.26  | 0.54  | 1.04 | 0.51    | .608            | -1.51  | 2.58  |
|              | <i>q</i> | -0.03         | 0.20 | -0.14   | .888            | -0.42  | 0.36  | -0.19 | 0.33 | -0.55   | .580            | -0.84  | 0.47  |
| 1980-1976    | <i>i</i> | 6.89          | 0.19 | 35.72   | < .001          | 6.51   | 7.27  | 6.86  | 0.28 | 24.32   | < .001          | 6.31   | 7.42  |
|              | <i>s</i> | 1.37          | 0.38 | 3.59    | < .001          | 0.62   | 2.13  | 2.03  | 0.56 | 3.61    | < .001          | 0.93   | 3.13  |
|              | <i>q</i> | 0.21          | 0.18 | 1.19    | .233            | -0.14  | 0.56  | 0.49  | 0.26 | 1.85    | .064            | -0.03  | 1.00  |
| 1975-1971    | <i>i</i> | 6.19          | 0.05 | 134.65  | < .001          | 6.10   | 6.28  | 5.76  | 0.07 | 88.62   | < .001          | 5.63   | 5.89  |
|              | <i>s</i> | 1.37          | 0.18 | 7.51    | < .001          | 1.02   | 1.73  | 0.66  | 0.26 | 2.50    | .012            | 0.14   | 1.17  |
|              | <i>q</i> | 0.35          | 0.16 | 2.26    | .024            | 0.05   | 0.66  | -0.29 | 0.23 | -1.29   | .196            | -0.73  | 0.15  |
| 1970-1966    | <i>i</i> | 5.46          | 0.03 | 216.10  | < .001          | 5.41   | 5.51  | 5.19  | 0.03 | 153.54  | < .001          | 5.12   | 5.26  |
|              | <i>s</i> | 0.97          | 0.05 | 20.76   | < .001          | 0.88   | 1.06  | 0.92  | 0.06 | 14.31   | < .001          | 0.79   | 1.04  |
|              | <i>q</i> | 0.05          | 0.14 | 0.32    | .748            | -0.24  | 0.33  | -0.28 | 0.19 | -1.45   | .146            | -0.65  | 0.10  |
| 1965-1961    | <i>i</i> | 4.89          | 0.04 | 141.02  | < .001          | 4.82   | 4.95  | 4.58  | 0.04 | 107.99  | < .001          | 4.50   | 4.67  |
|              | <i>s</i> | 0.90          | 0.13 | 6.94    | < .001          | 0.64   | 1.15  | 1.15  | 0.16 | 7.43    | < .001          | 0.85   | 1.46  |
|              | <i>q</i> | 0.07          | 0.14 | 0.49    | .623            | -0.21  | 0.34  | -0.28 | 0.17 | -1.60   | .110            | -0.61  | 0.06  |
| 1960-1956    | <i>i</i> | 4.67          | 0.12 | 39.85   | < .001          | 4.44   | 4.89  | 4.05  | 0.15 | 27.64   | < .001          | 3.76   | 4.34  |
|              | <i>s</i> | 0.36          | 0.26 | 1.38    | .166            | -0.15  | 0.87  | 1.00  | 0.32 | 3.09    | .002            | 0.37   | 1.63  |
|              | <i>q</i> | 0.28          | 0.14 | 2.07    | .039            | 0.02   | 0.55  | -0.02 | 0.17 | -0.10   | .921            | -0.35  | 0.32  |
| 1955-1951    | <i>i</i> | 3.28          | 0.31 | 10.66   | < .001          | 2.68   | 3.89  | 3.50  | 0.36 | 9.65    | < .001          | 2.79   | 4.21  |
|              | <i>s</i> | 1.62          | 0.45 | 3.62    | < .001          | 0.74   | 2.49  | 1.13  | 0.53 | 2.15    | .032            | 0.10   | 2.16  |
|              | <i>q</i> | -0.19         | 0.16 | -1.23   | .218            | -0.50  | 0.11  | -0.11 | 0.19 | -0.60   | .547            | -0.47  | 0.25  |
| 1950-1946    | <i>i</i> | 4.14          | 0.68 | 6.07    | < .001          | 2.80   | 5.48  | 4.27  | 0.76 | 5.63    | < .001          | 2.79   | 5.76  |
|              | <i>s</i> | -0.25         | 0.73 | -0.35   | .730            | -1.69  | 1.18  | -0.51 | 0.82 | -0.63   | .529            | -2.11  | 1.09  |
|              | <i>q</i> | 0.37          | 0.19 | 1.90    | .057            | -0.01  | 0.75  | 0.38  | 0.22 | 1.78    | .076            | -0.04  | 0.81  |
| 1945-1941    | <i>i</i> | 4.05          | 1.41 | 2.88    | .004            | 1.29   | 6.81  | 6.84  | 1.52 | 4.49    | < .001          | 3.86   | 9.83  |
|              | <i>s</i> | -0.29         | 1.20 | -0.24   | .808            | -2.64  | 2.06  | -2.89 | 1.29 | -2.24   | .025            | -5.42  | -0.36 |
|              | <i>q</i> | 0.29          | 0.25 | 1.14    | .256            | -0.21  | 0.78  | 0.82  | 0.27 | 3.01    | .003            | 0.29   | 1.35  |
| 1940-1936    | <i>i</i> | 11.00         | 2.76 | 3.98    | < .001          | 5.58   | 16.41 | 7.23  | 2.82 | 2.56    | .010            | 1.70   | 12.76 |
|              | <i>s</i> | -5.24         | 1.96 | -2.68   | .007            | -9.08  | -1.41 | -2.88 | 1.99 | -1.45   | .148            | -6.78  | 1.02  |
|              | <i>q</i> | 1.07          | 0.34 | 3.12    | .002            | 0.40   | 1.75  | 0.68  | 0.35 | 1.96    | .051            | -0.00  | 1.36  |

*i* = intercept, *s* = linear slope, *q* = quadratic slope.

Supplementary Table 12. Parameter coefficients for the partially-constrained cohort-based models for “Climate change is real” (reality) for women and men

|             |                             | Climate Reality |      |         |                 |         |       |           |      |
|-------------|-----------------------------|-----------------|------|---------|-----------------|---------|-------|-----------|------|
|             |                             | Means           |      |         |                 | 95% CIs |       | Variances |      |
| Women       |                             | Estimate        | SE   | Est./SE | <i>p</i> -value | LB      | UB    | Est       | SE   |
| 1995-1991   |                             | 8.45            | 0.05 | 158.62  | < .001          | 8.35    | 8.56  | 1.13*     | 0.01 |
| 1990-1986   |                             | 7.96            | 0.04 | 191.91  | < .001          | 7.88    | 8.04  | 1.13*     | 0.01 |
| 1985-1981   |                             | 7.48            | 0.03 | 231.81  | < .001          | 7.41    | 7.54  | 1.13*     | 0.01 |
| 1980-1976   |                             | 7.04            | 0.03 | 277.36  | < .001          | 6.99    | 7.09  | 1.13*     | 0.01 |
| 1975-1971   | Intercepts                  | 6.49            | 0.02 | 316.77  | < .001          | 6.45    | 6.53  | 1.13*     | 0.01 |
| 1970-1966   | freely                      | 5.94            | 0.02 | 311.86  | < .001          | 5.90    | 5.97  | 1.13*     | 0.01 |
| 1965-1961   | estimated                   | 5.38            | 0.02 | 266.64  | < .001          | 5.35    | 5.42  | 1.13*     | 0.01 |
| 1960-1956   |                             | 4.94            | 0.03 | 199.76  | < .001          | 4.89    | 4.99  | 1.13*     | 0.01 |
| 1955-1951   |                             | 4.46            | 0.03 | 130.06  | < .001          | 4.39    | 4.53  | 1.13*     | 0.01 |
| 1950-1946   |                             | 3.93            | 0.06 | 71.94   | < .001          | 3.82    | 4.04  | 1.13*     | 0.01 |
| 1945-1941   |                             | 3.51            | 0.08 | 46.69   | < .001          | 3.37    | 3.66  | 1.13*     | 0.01 |
| 1940-1936   |                             | 3.04            | 0.11 | 28.33   | < .001          | 2.83    | 3.25  | 1.13*     | 0.01 |
| All cohorts | Linear slope constrained    | 0.91            | 0.01 | 64.46   | < .001          | 0.88    | 0.94  | 0.05**    | 0.01 |
| All cohorts | Quadratic slope constrained | -0.00           | 0.01 | -0.71   | .479            | -0.01   | 0.01  | 0.00      | 0.00 |
| Men         |                             | Estimate        | SE   | Est./SE | <i>p</i> -value | LB      | UB    | Est       | SE   |
| 1995-1991   |                             | 8.56            | 0.08 | 110.75  | < .001          | 8.41    | 8.71  | 1.13*     | 0.01 |
| 1990-1986   |                             | 7.90            | 0.06 | 131.51  | < .001          | 7.79    | 8.02  | 1.13*     | 0.01 |
| 1985-1981   |                             | 7.39            | 0.05 | 158.85  | < .001          | 7.30    | 7.48  | 1.13*     | 0.01 |
| 1980-1976   |                             | 6.86            | 0.04 | 193.28  | < .001          | 6.79    | 6.93  | 1.13*     | 0.01 |
| 1975-1971   | Intercepts                  | 6.29            | 0.03 | 222.67  | < .001          | 6.23    | 6.34  | 1.13*     | 0.01 |
| 1970-1966   | freely                      | 5.69            | 0.03 | 226.92  | < .001          | 5.64    | 5.74  | 1.13*     | 0.01 |
| 1965-1961   | estimated                   | 5.15            | 0.03 | 200.06  | < .001          | 5.10    | 5.20  | 1.13*     | 0.01 |
| 1960-1956   |                             | 4.69            | 0.03 | 154.89  | < .001          | 4.63    | 4.75  | 1.13*     | 0.01 |
| 1955-1951   |                             | 4.17            | 0.04 | 103.00  | < .001          | 4.09    | 4.25  | 1.13*     | 0.01 |
| 1950-1946   |                             | 3.60            | 0.06 | 58.09   | < .001          | 3.48    | 3.72  | 1.13*     | 0.01 |
| 1945-1941   |                             | 3.05            | 0.08 | 37.20   | < .001          | 2.89    | 3.21  | 1.13*     | 0.01 |
| 1940-1936   |                             | 2.74            | 0.11 | 24.80   | < .001          | 2.53    | 2.96  | 1.13*     | 0.01 |
| All cohorts | Linear slope constrained    | 0.96            | 0.02 | 50.45   | < .001          | 0.93    | 1.00  | 0.05*     | 0.01 |
| All cohorts | Quadratic slope constrained | -0.02           | 0.01 | -2.24   | .025            | -0.03   | -0.00 | 0.00      | 0.00 |

\*  $p < .001$

Supplementary Table 13. Parameter coefficients for the partially-constrained cohort-based models for “Climate change is caused by humans” (cause) for women and men

|             |                             | Climate Cause |      |         |                 |       |           |        |      |
|-------------|-----------------------------|---------------|------|---------|-----------------|-------|-----------|--------|------|
|             |                             | Means         |      |         | 95% CIs         |       | Variances |        |      |
| Women       |                             | Estimate      | SE   | Est./SE | <i>p</i> -value | LB    | UB        | Est    | SE   |
| 1995-1991   |                             | 8.46          | 0.06 | 145.26  | < .001          | 8.35  | 8.58      | 1.54*  | 0.02 |
| 1990-1986   |                             | 7.85          | 0.05 | 173.14  | < .001          | 7.76  | 7.94      | 1.54*  | 0.02 |
| 1985-1981   |                             | 7.34          | 0.04 | 206.14  | < .001          | 7.27  | 7.41      | 1.54*  | 0.02 |
| 1980-1976   |                             | 6.80          | 0.03 | 239.62  | < .001          | 6.74  | 6.85      | 1.54*  | 0.02 |
| 1975-1971   | Intercepts                  | 6.14          | 0.02 | 265.58  | < .001          | 6.09  | 6.18      | 1.54*  | 0.02 |
| 1970-1966   | freely                      | 5.46          | 0.02 | 252.92  | < .001          | 5.41  | 5.50      | 1.54*  | 0.02 |
| 1965-1961   | estimated                   | 4.84          | 0.02 | 213.53  | < .001          | 4.79  | 4.88      | 1.54*  | 0.02 |
| 1960-1956   |                             | 4.31          | 0.03 | 157.75  | < .001          | 4.26  | 4.36      | 1.54*  | 0.02 |
| 1955-1951   |                             | 3.76          | 0.04 | 100.01  | < .001          | 3.69  | 3.84      | 1.54*  | 0.02 |
| 1950-1946   |                             | 3.11          | 0.06 | 50.65   | < .001          | 2.99  | 3.23      | 1.54*  | 0.02 |
| 1945-1941   |                             | 2.64          | 0.09 | 31.07   | < .001          | 2.48  | 2.81      | 1.54*  | 0.02 |
| 1940-1936   |                             | 2.12          | 0.12 | 17.32   | < .001          | 1.88  | 2.36      | 1.54*  | 0.02 |
| All cohorts | Linear slope constrained    | 1.04          | 0.02 | 69.31   | < .001          | 1.01  | 1.07      | 0.10** | 0.01 |
| All cohorts | Quadratic slope constrained | -0.02         | 0.01 | -4.26   | < .001          | -0.03 | -0.01     | 0.00   | 0.00 |
| Men         |                             | Estimate      | SE   | Est./SE | <i>p</i> -value | LB    | UB        | Est    | SE   |
| 1995-1991   |                             | 8.40          | 0.09 | 99.15   | < .001          | 8.23  | 8.56      | 1.54*  | 0.02 |
| 1990-1986   |                             | 7.63          | 0.07 | 115.83  | < .001          | 7.50  | 7.76      | 1.54*  | 0.02 |
| 1985-1981   |                             | 7.10          | 0.05 | 137.81  | < .001          | 7.00  | 7.20      | 1.54*  | 0.02 |
| 1980-1976   |                             | 6.43          | 0.04 | 162.37  | < .001          | 6.35  | 6.51      | 1.54*  | 0.02 |
| 1975-1971   | Intercepts                  | 5.86          | 0.03 | 184.10  | < .001          | 5.80  | 5.92      | 1.54*  | 0.02 |
| 1970-1966   | freely                      | 5.16          | 0.03 | 181.76  | < .001          | 5.11  | 5.22      | 1.54*  | 0.02 |
| 1965-1961   | estimated                   | 4.56          | 0.03 | 157.78  | < .001          | 4.50  | 4.61      | 1.54*  | 0.02 |
| 1960-1956   |                             | 4.04          | 0.03 | 120.94  | < .001          | 3.98  | 4.11      | 1.54*  | 0.02 |
| 1955-1951   |                             | 3.47          | 0.04 | 78.20   | < .001          | 3.39  | 3.56      | 1.54*  | 0.02 |
| 1950-1946   |                             | 2.90          | 0.07 | 41.70   | < .001          | 2.76  | 3.04      | 1.54*  | 0.02 |
| 1945-1941   |                             | 2.41          | 0.09 | 26.07   | < .001          | 2.23  | 2.59      | 1.54*  | 0.02 |
| 1940-1936   |                             | 1.97          | 0.13 | 15.66   | < .001          | 1.72  | 2.21      | 1.54*  | 0.02 |
| All cohorts | Linear slope constrained    | 1.04          | 0.02 | 50.84   | < .001          | 1.00  | 1.08      | 0.10*  | 0.01 |
| All cohorts | Quadratic slope constrained | -0.05         | 0.01 | -6.24   | < .001          | -0.06 | -0.03     | 0.00   | 0.00 |

\**p* < .001
